# Supplementary material
Source: PubMed Central journal article supplement (PMC5879960)
Supplement: JOA-232-857-s001.pdf [file JOA-232-857-s001.pdf]

# Fitting unanchored puzzle piece in the skeleton: spatial scapular position optimized for the steady support in quadrupedal tetrapods:

## Supporting Information

Shin-ichi Fujiwara

The Nagoya University Museum, Furocho, Chikusa, Nagoya, 464-8601 Japan

---

### Introduction

- Fig. S1** Difference of the skeletal posture depending on the possible positions to the rib cage in *Felis*. p. 1  
**Fig. S2** Difference of the scapular positions among skeletal mounts of *Triceratops* (Ceratopsia, Dinosauria). p. 1  
**Fig. S3** Scapular position shared by extant non-testudine quadrupedal tetrapods. p. 2  
**Fig. S4** Scapular positions in flying and obligate bipedal tetrapods. p. 3  
**Fig. S5** Scapular positions in semi-aquatic and obligate aquatic tetrapods. p. 3  
**Fig. S6** Scapular positions of testudines. p. 3

### Mechanical models and hypothesis

- Fig. S7** Muscular connection between the scapula and rib cage in *Felis*. p. 4  
**Fig. S8** The orientations of the muscle fascicles depending on the scapular positions. p. 4

### Materials and methods

#### 3D imaging of the specimens

- Table S1** The specimens and CT scans used in this study. p. 5  
**Fig. S9** Posture of the CT scanned specimen (*Felis*). p. 5  
**Table S2** The forces applied to each muscle fascicle and to the centre of mass of the uplifted body in the rotation model. p. 6  
**Fig. S10** Definitions of the rotational (roll, yaw, and pitch) axes of the uplifted body element in this study. p. 7

#### 3D rotation model

- Fig. S11** Rotation models of *Felis*, *Rattus*, and *Chamaeleo*. p. 8  
**Fig. S12** Paths of the muscle fascicles modeled in the rotation models. p. 9  
**Fig. S13** An example of the moment analysis in the rotation model. p. 9  
**Table S3** The conditions of the moment analyses. p. 10

#### 3D distortion model

- Fig. S14** Boundary conditions of the distortion models in *Felis*, *Rattus*, and *Chamaeleo*. p. 11

### Results

#### Appropriate scapular positions in the rotation model

- Fig. S15** The appropriate scapular positions in support on right forelimb in *Felis* (3D PDF). p. 12  
**Fig. S16** The appropriate scapular positions in support on right forelimb in *Rattus* (3D PDF). p. 13  
**Fig. S17** The appropriate scapular positions in support on right forelimb in *Chamaeleo* (3D PDF). p. 14  
**Fig. S18** The appropriate scapular positions estimated for *Felis* in rotation models with the COM accelerated in different orientations. p. 15  
**Fig. S19** The appropriate scapular positions estimated for *Felis* in rotation models with the thoracic muscles activated in different contractile forces. p. 16

### Rotation models

- Appendix S1** Rotation model of *Felis* for SIMM 6.0.3.  
**Appendix S2** Rotation model of *Rattus* for SIMM 6.0.3.  
**Appendix S3** Rotation model of *Chamaeleo* for SIMM 6.0.3.  
SIMM 6.0.3 (Musculographics Inc., Santa Rosa, USA) is required to be installed to open these files. Each data is composed of joint (JNT), muscle (MSL), and bone (ASC) files. They are compressed into RAR file format.
-

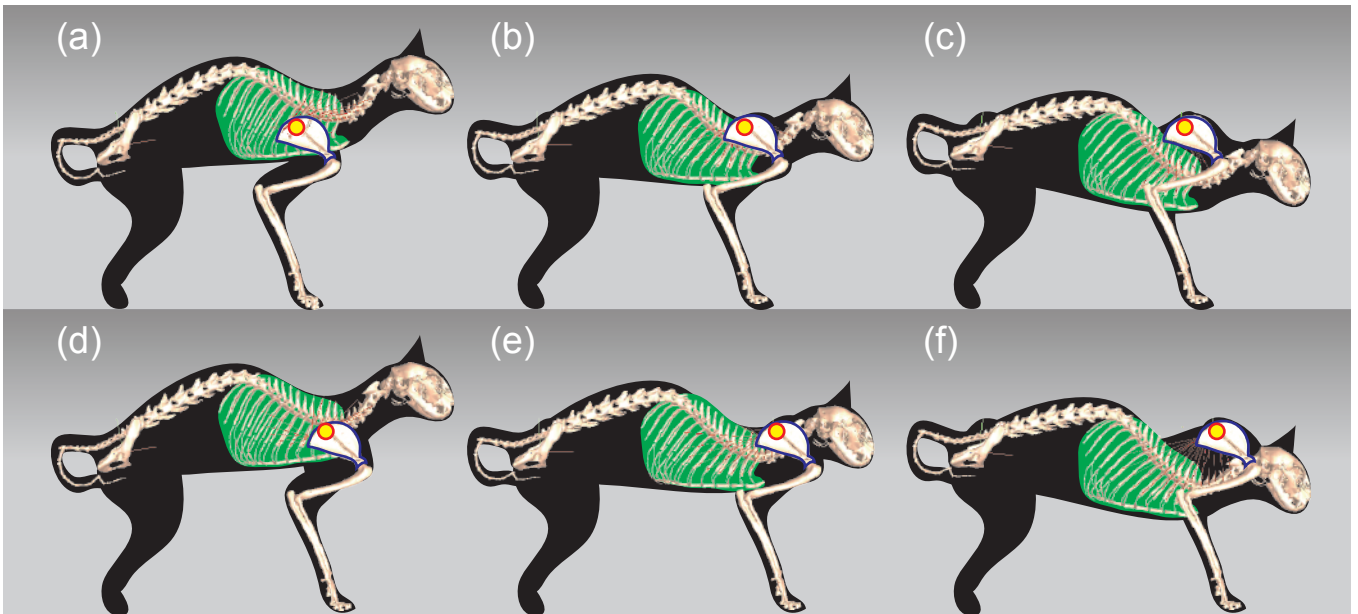

**Fig. S1** Difference of the skeletal posture depending on the possible scapular positions to the rib cage in *Felis*. The scapulae are outlined in blue, and the rib cages are indicated in green. The top position of the scapulae were marked with the red circle filled with yellow. The skeletal postures excluding the scapular positions are same. The scapulae are respectively positioned at (a–c) posterior; (d–f) anterior; (a, d) ventral; (b, e) near the vertebral column; and (c, f) high above the vertebral column.

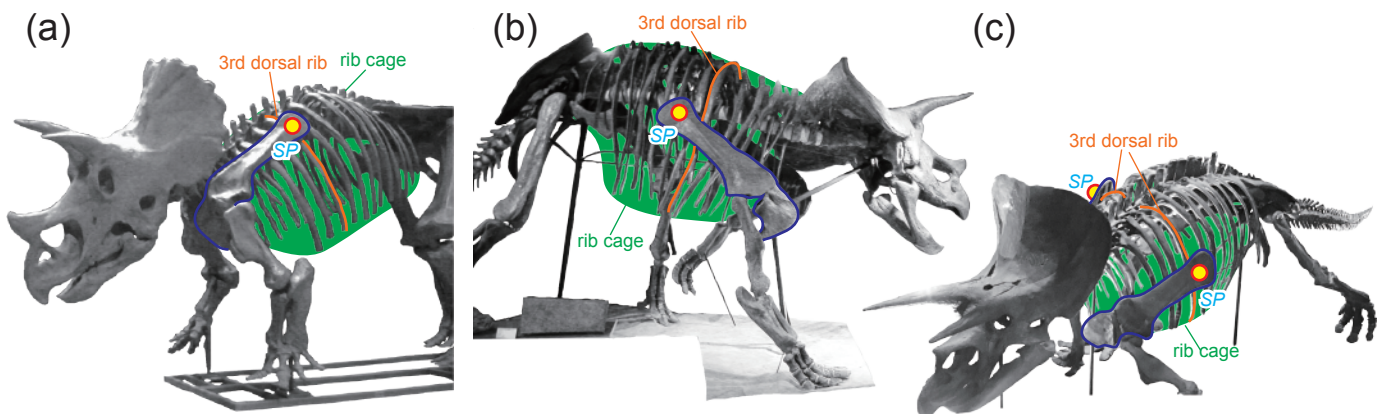

**Fig. S2** Difference of the scapular positions (*SP*) among skeletal mounts of *Triceratops* (Ceratopsia, Dinosauria). The top position of the scapulae were marked with the red circle filled with yellow. The positions of the rib cage indicated in green and the 3rd dorsal rib outlined in orange were shown for comparison. The skeletal mounts are (a) NSM PV unnumbered; (b) GMNH PV 124; and (c) KMNH, catalog no. 1985X22VP03. The scapulae are positioned cranio-dorso-medially in (a), caudo-ventro-laterally in (b), and cranio-ventro-laterally in (c). Institutional Abbreviations: GMNH, Gunma Museum of Natural History, Tomioka, Japan; KMNH, Kitakyushu Museum of Natural History, Kitakyushu, Japan; NSM, National Museum of Nature and Science, Tokyo, Japan.

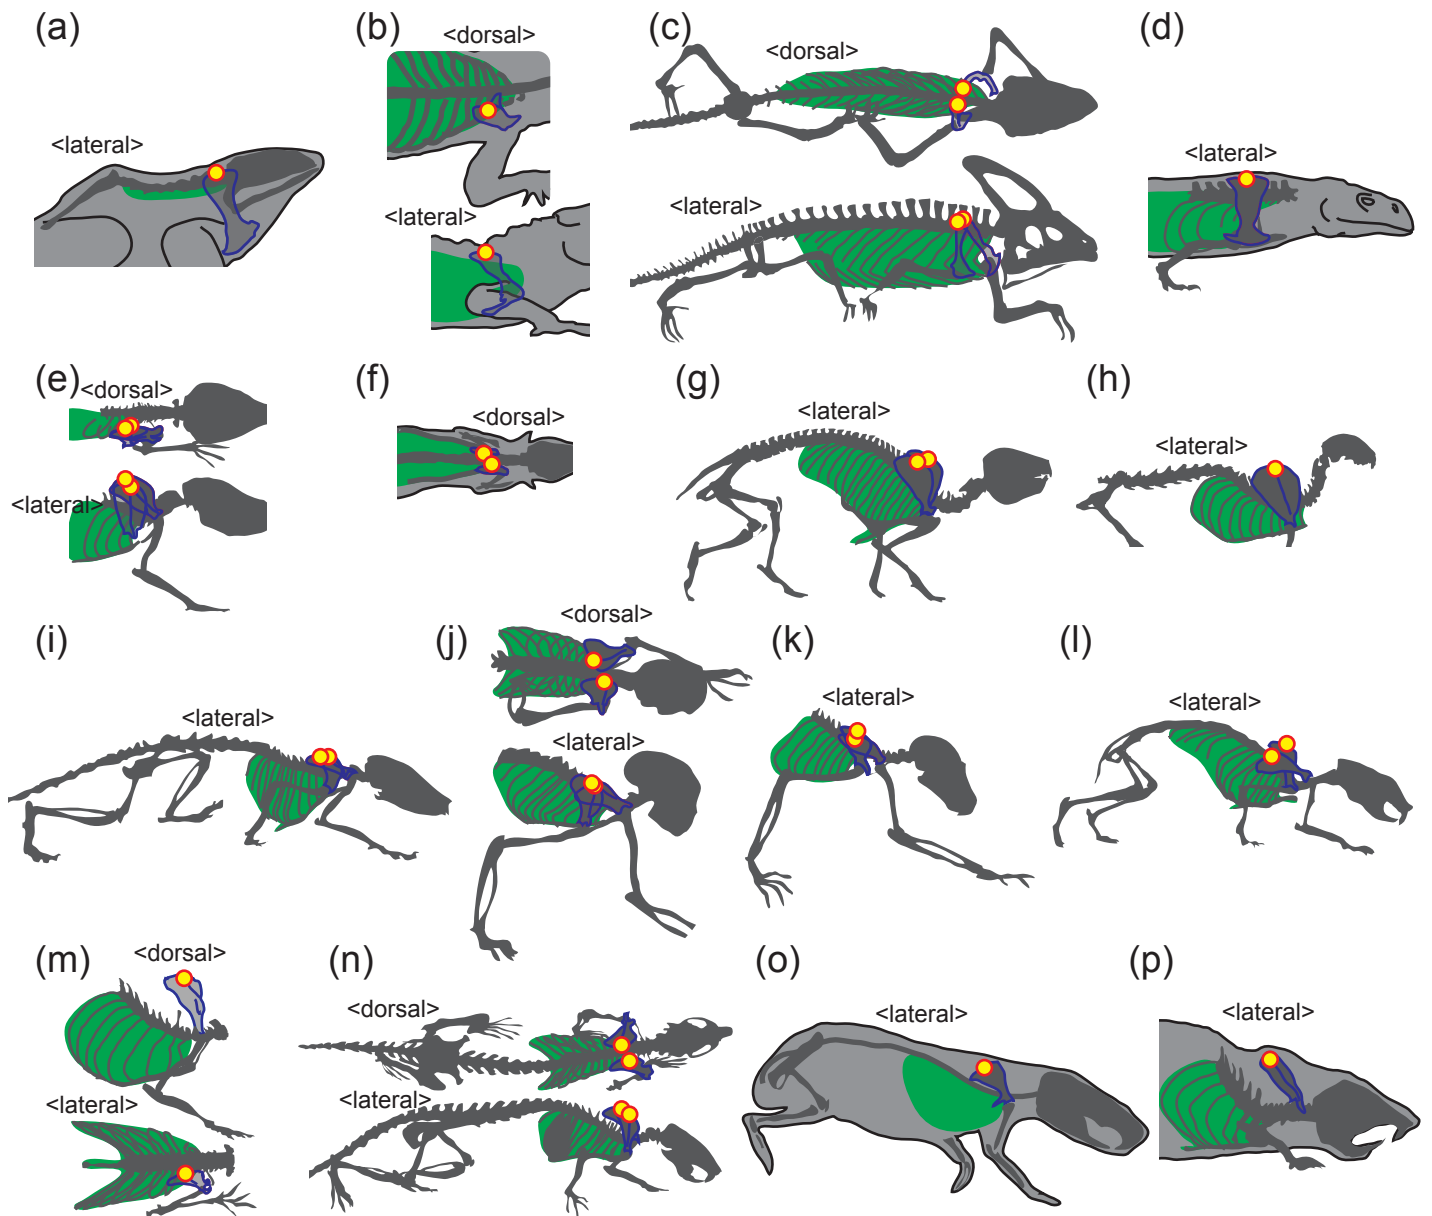

**Fig. S3** Scapular positions shared by extant non-testudine quadrupedal tetrapods. The silhouettes of the animals in motions in the dorsal and the right lateral views were redrawn from the cineradiographic images. The scapulae/scapulocoracoids were outlined in blue, the trunks were coloured in green, and the top positions of the scapulae were marked with the red circles filled with yellow. (a) *Rana* (Jenkins & Shubin, 1998); (b) *Alligator* (Baier & Gatesy, 2013); (c) *Chamaeleo* (Fischer et al., 2010); (d) *Varanus* (Jenkins & Goslow, 1983); (e) *Didelphis* (Jenkins & Weijs, 1979); (f) *Monodelphis* (Pridmore, 1992); (g) *Procavia* (Fischer, 1994); (h) *Felis* (Macphersen & Ye, 1998); (i) *Tupaia* (Schilling & Fischer, 1999); (j) *Saimiri* (Schmidt, 2005); (k) *Eulemur* (Schmidt & Fischer, 2000); (l) *Ochotona* (Fischer & Lehman, 1998); (m) *Rattus* (Jenkins, 1974); (n) *Rattus* (Schmidt & Fischer, 2011); (o) *Cavia* (Rocha-Barbosa et al., 2005); (p) *Spalax* (Gambaryan et al., 2005). Taxonomic variations: (a) Anura; (b) Crocodylia; (c, d) Lepidosaurmorphia; (e, f) Didelphiomorpha; (g) Hyracoidea; (h) Carnivora; (i) Scandentia; (j, k) Primates; (l) Lagomorpha; (m–o) Rodentia. See References in the main text.

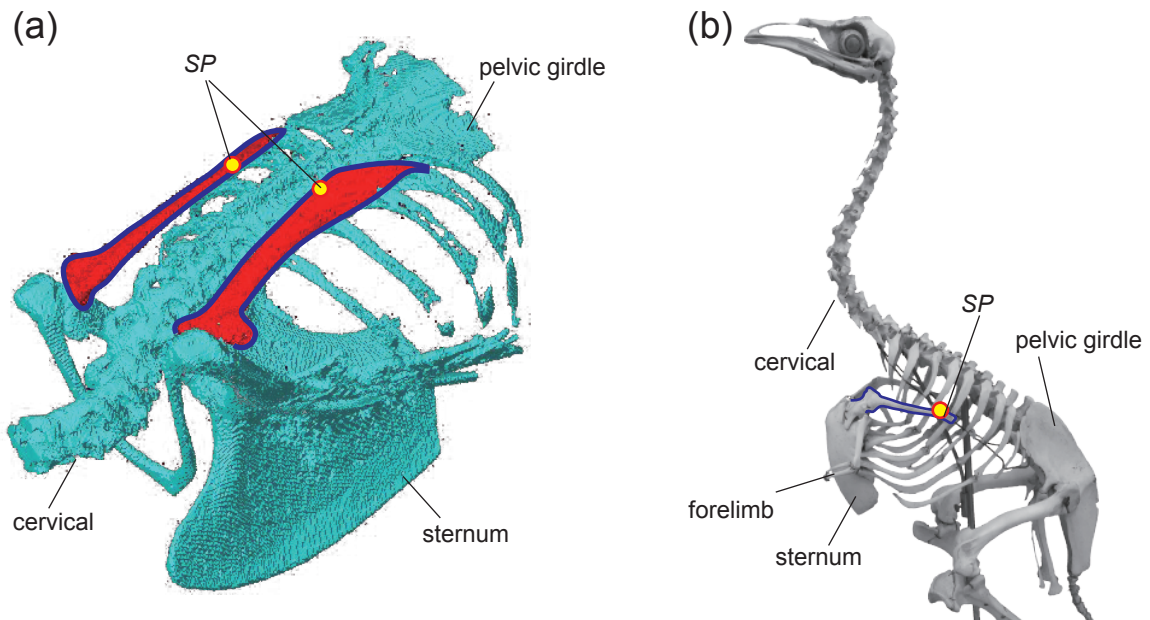

**Fig. S4** Scapular positions (*SP*) in (a) flying (SIF unnumbered: *Columba livia*, Columbidae, Columbiformes, Aves) and (b) obligate bipedal (NUM unnumbered: *Casuarius sp.*, Casuariidae, Casuariiformes, Aves) tetrapods. The scapulae are outlined in blue. Institutional abbreviations: NUM, The Nagoya University Museum, Nagoya University, Nagoya, Japan; SIF, personal collections of Shin-ichi Fujiwara, Nagoya University Museum, Nagoya, Japan.

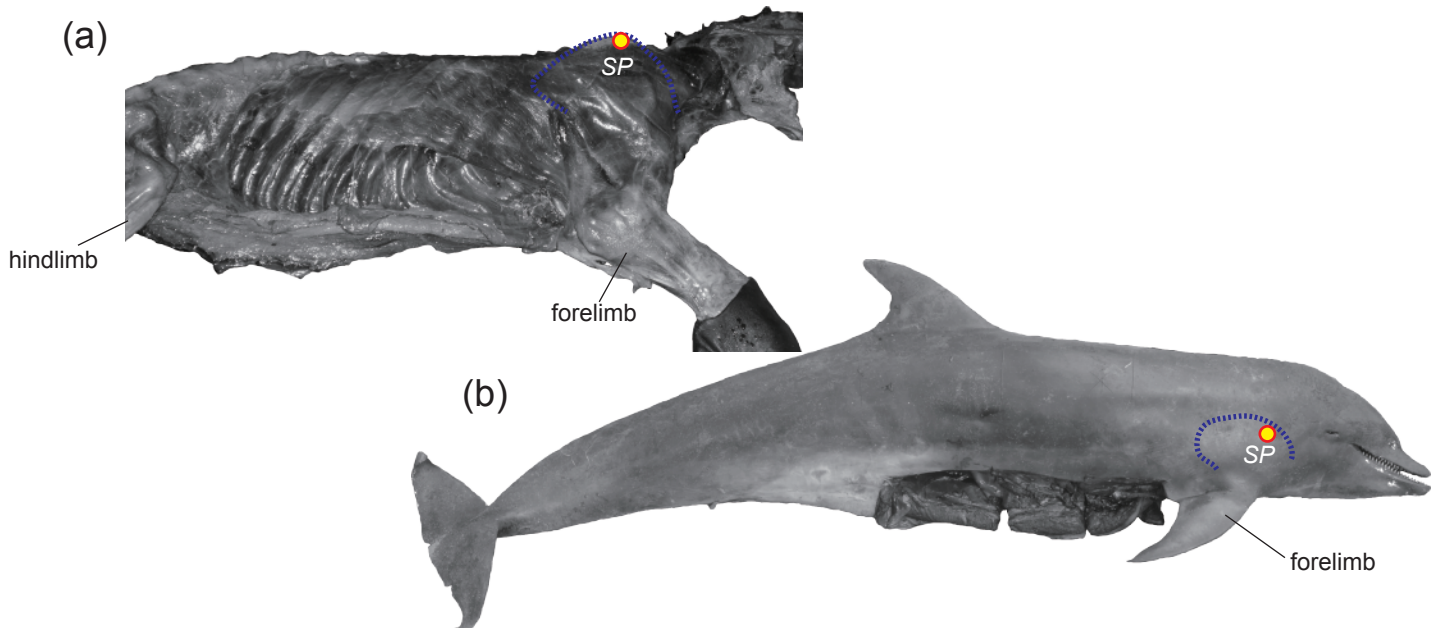

**Fig. S5** Scapular positions (*SP*) in (a) semi-aquatic (UMUT unnumbered: *Callorhinus ursinus*, Otariidae, Carnivora, Mammalia) and (b) obligate aquatic (UMUT unnumbered: *Tursiops truncatus*, Delphinidae, Cetacea, Mammalia) tetrapods. The dorsal margins of the scapulae are indicated in blue dotted line. Institutional abbreviation: UMUT, The University Museum, The University of Tokyo, Tokyo, Japan.

**Fig. S6** Scapular positions of testudines. Anterior-half of *Mauremys japonica* (SIF 002) shown in caudo-lateral view. The top positions of the scapulae (*SP*) were marked with the red circles filled with yellow. Note that the scapulo-coracoid is positioned inside the rib cage (carapace). Institutional Abbreviation: SIF, personal collection of Shin-ichi Fujiwara, The Nagoya University Museum, Nagoya, Japan.

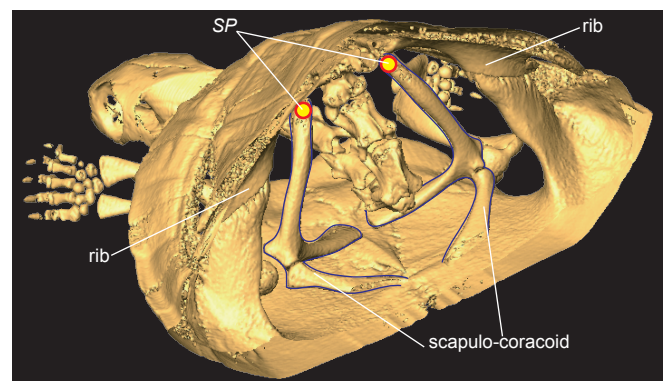

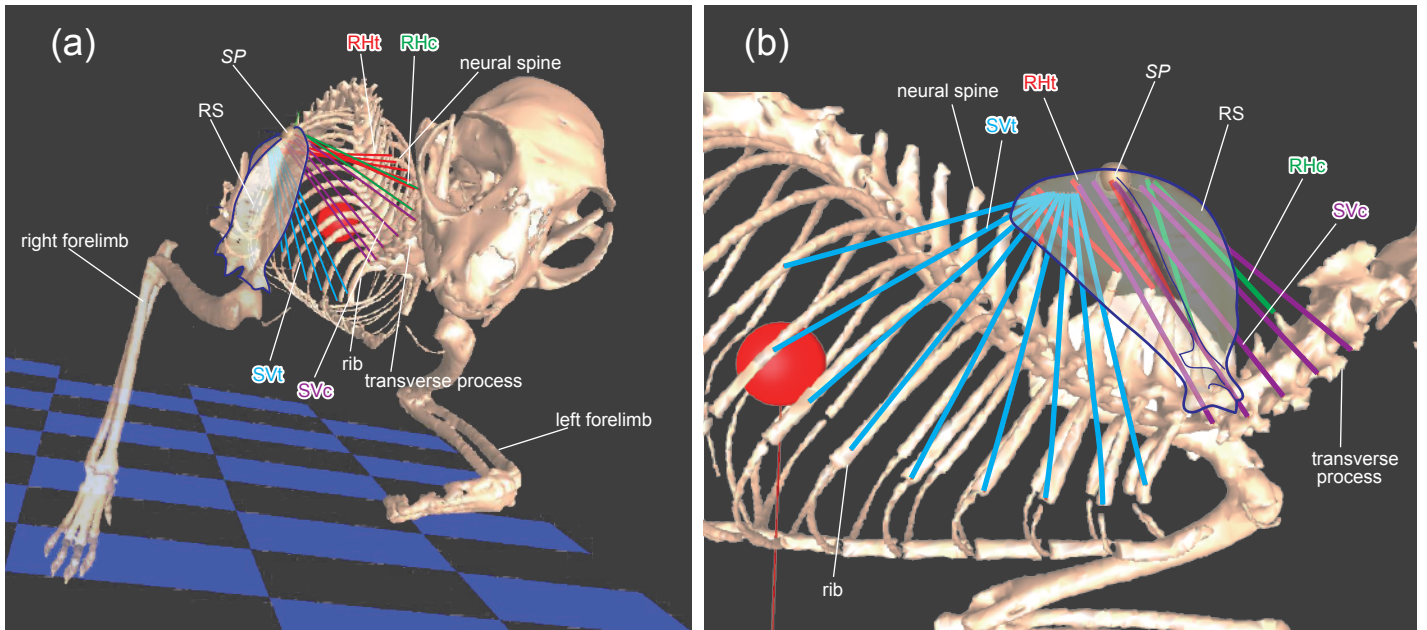

**Fig. S7** Muscular connection between the scapula and rib cage in *Felis*. The skeleton is shown in (a) the cranial and (b) the right lateral views in perspective projection. The hindlimb skeletons are not visualized here. The scapular position (*SP*) was defined at the dorsal margin of the scapula. The fascicles of thoracic muscles (*RHc*, *m. rhomboideus cervicis*; *RHt*, *m. rhomboideus thoracis*; *SVc*, *m. serratus ventralis cervicis*; *SVt*, *m. serratus ventralis thoracis*) connecting the rib cage and right scapula (*RS*) are shown in lines of the different colour (*RHc*, green; *RHt*, red; *SVc*, purple; *SVt*, light blue). The *RHc* and *RHt* originates from the neural spines of the cervical and thoracic vertebrae, respectively; and the *SVc* and *SVt* originates from the transverse processes of the cervical vertebrae and lateral aspects of the anterior ribs, respectively. Note that all the thoracic muscle fascicles (*RHc*, *RHt*, *SVc*, and *SVt*) insert to the dorso-medial aspect (near *SP*) of the scapula.

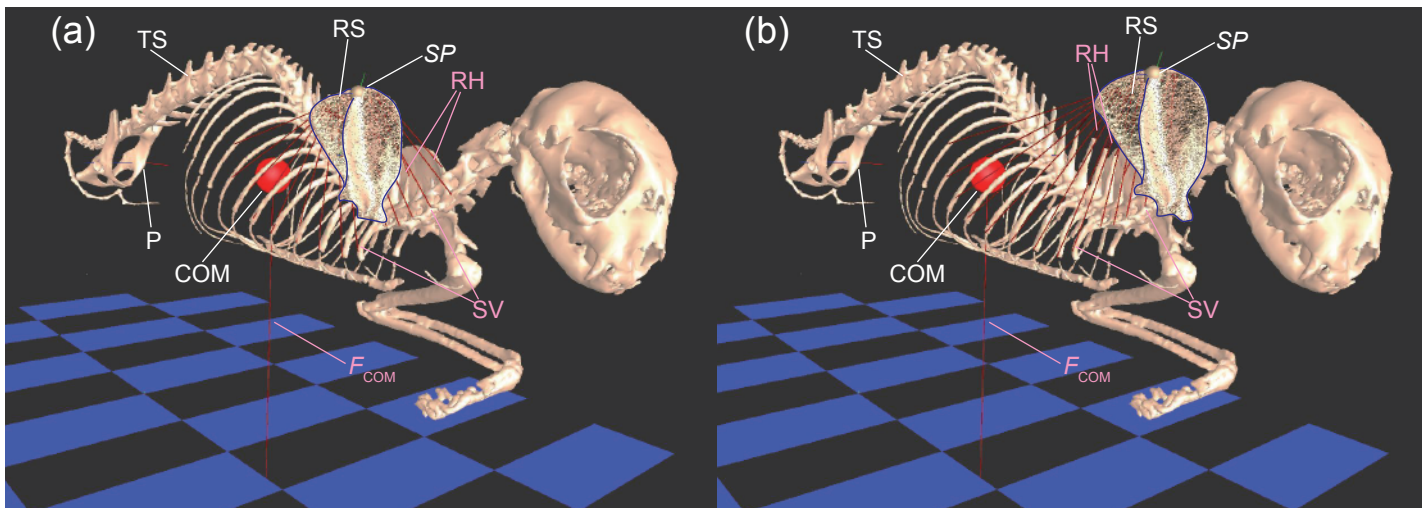

**Fig. S8** The orientations of the muscle fascicles depending on the scapular positions. The right scapulae (*RH*) are in relatively (a) posterior and (b) anterior positions. The model assumes a stance on right forelimb and hindlimbs. The centre of mass (*COM*) of the uplifted portion of the body, which is composed of the skull, trunk, and the left forelimb, is subjected to gravitational force ( $F_{COM}$ ). The scapular position (*SP*) was defined as the point on the top position of the scapula, the point where the *m. rhomboideus* (*RH*) and *m. serratus ventralis* (*SV*) insert. Note that the orientations of the paths of muscle fascicles (*RH* and *SV*) depend on the scapular position (*SP*). Abbreviations: *P*, a common pivot of the uplifted portion of the body and the thoracic skeleton (*TS*) about the acetabulum; *RS*, right scapula. The images were shown in the perspective projections. The three-dimensional musculoskeletal model was constructed using SIMM 6.0.3 (Musculographics Inc.).

**Table S1** The specimens and CT scans used in this study. The scan resolution indicates the slice pitch and the pixel length of the CT scanned images.

| taxa                     | specimen   | body mass | CT scan         | scan resolution | Institution   |
|--------------------------|------------|-----------|-----------------|-----------------|---------------|
| <i>Felis catus</i>       | SIF 005    | 2.6 kg    | TSX-021B/4B     | 1 mm            | UMUT          |
| <i>Rattus norvegicus</i> | SIF 012    | 74.5 g    | Latheta LCT-100 | 0.25 mm         | NMNS, Tsukuba |
| <i>Chamaeleo melleri</i> | KPM NFR476 | 335 g     | TXS320-ACTIS    | 0.1 mm          | NMNS, Tokyo   |

CT scan: Latheta LCT-100, Hitachi Aloca Medical, Ltd., Mitaka, Japan; TSX-021B/4B, Toshiba Medical Systems Co., Ltd., Otawara, Japan; TXS320-ACTIS, Tesco Co., Ltd., Tokyo, Japan.

Institution: KPM, Kanagawa Prefectural Museum, Odawara, Japan; NMNS, National Museum of Nature and Science, Tsukuba/Tokyo, Japan; SIF, personal collections of Shin-ichi Fujiwara, The Nagoya University Museum, Nagoya, Japan; UMUT, The University Museum, The University of Tokyo, Tokyo, Japan.

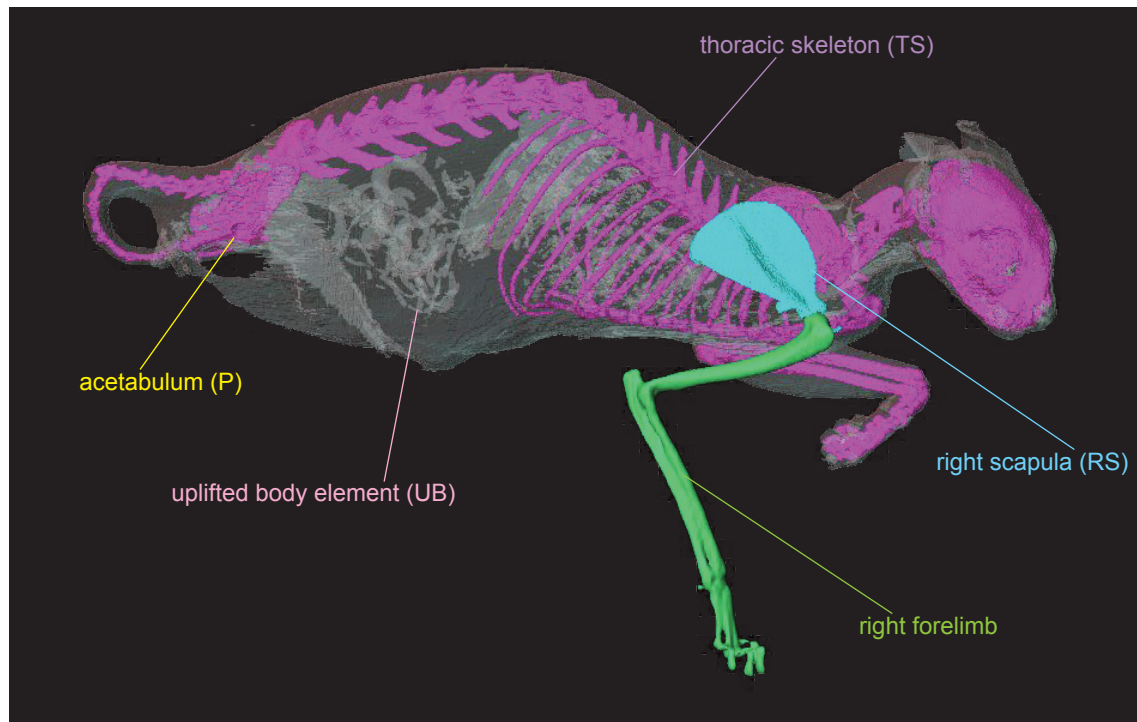

**Fig. S9** Posture of the CT scanned specimen (*Felis*). The specimens were posed in posture during the stance on right forelimb and hindlimbs. The CT scanned data were used to reconstruct three-dimensional polygons of the body uplifted by the right forelimb and hindlimbs (UB), the thoracic skeleton (TS), and the right scapula (RS). This image was shown in the orthogonal projection. The segmentation was conducted using Avizo 8.1 (FEI Visualization Sciences Group).

**Table S2** The forces applied to each muscle fascicle ( $F_{max}$ ) and to the centre of mass (COM) of the uplifted body ( $F_{COM}$ ) in the rotation model. The  $F_{max}$  was estimated by the physiological cross section area of the fascicle. Abbreviations for “muscle/force” are as follows:  $F_{COM}$ , product of the mass of uplifted body elements and gravity acceleration; LS, *m. levator scapulae*; RHc, *m. rhomboideus cervicis*; RHt, *m. rhomboideus thoracis*; SVc, *m. serratus ventralis cervicis*; SVt, *m. serratus ventralis thoracis*; TR, *m. trapezius*.

| taxa                                  | specimen                                      | muscle/force                           | fascicle origin                     | force (N)                                 |                              |       |
|---------------------------------------|-----------------------------------------------|----------------------------------------|-------------------------------------|-------------------------------------------|------------------------------|-------|
| <i>Felis catus</i>                    | SIF 005                                       | SVc                                    | 3rd cervical, transverse process    | 2.559                                     |                              |       |
|                                       |                                               |                                        | 4th cervical, transverse process    | 2.733                                     |                              |       |
|                                       |                                               |                                        | 5th cervical, transverse process    | 3.886                                     |                              |       |
|                                       |                                               | SVt                                    | 6th cervical, transverse process    | 3.817                                     |                              |       |
|                                       |                                               |                                        | 7th cervical, transverse process    | 3.462                                     |                              |       |
|                                       |                                               |                                        | 1st thoracic rib, distal end        | 4.320                                     |                              |       |
|                                       |                                               |                                        | 2nd thoracic rib, distal end        | 2.029                                     |                              |       |
|                                       |                                               |                                        | 3rd thoracic rib, distal end        | 1.060                                     |                              |       |
|                                       |                                               |                                        | 4th thoracic rib, distal end        | 1.778                                     |                              |       |
|                                       |                                               |                                        | 5th thoracic rib, distal end        | 1.807                                     |                              |       |
|                                       |                                               |                                        | 6th thoracic rib, distal end        | 4.086                                     |                              |       |
|                                       |                                               |                                        | 7th thoracic rib, distal one-eighth | 3.534                                     |                              |       |
|                                       |                                               |                                        | 8th thoracic rib, distal one-fifth  | 2.734                                     |                              |       |
|                                       |                                               |                                        | 9th thoracic rib, distal two-fifth  | 1.406                                     |                              |       |
|                                       |                                               |                                        | RHc                                 | 3rd–7thcervical, neural spine, distal end | 6.963                        |       |
|                                       |                                               |                                        | RHt                                 | 1st thoracic, neural spine, distal end    | 3.887                        |       |
|                                       |                                               |                                        |                                     | 2nd thoracic, neural spine, distal end    | 3.994                        |       |
|                                       |                                               |                                        |                                     | 3rd thoracic, neural spine, distal end    | 2.415                        |       |
|                                       |                                               | 4th thoracic, neural spine, distal end |                                     | 1.664                                     |                              |       |
|                                       |                                               | 5th thoracic, neural spine, distal end |                                     | 1.272                                     |                              |       |
|                                       |                                               |                                        | $1 \times F_{COM}$                  | COM                                       | 25.497                       |       |
|                                       | $2 \times F_{COM}$                            | COM                                    | 50.995                              |                                           |                              |       |
|                                       | $3 \times F_{COM}$                            | COM                                    | 76.492                              |                                           |                              |       |
| <i>Rattus norvegicus</i>              | SIF 012                                       | LS                                     | occipital                           | 0.173                                     |                              |       |
|                                       |                                               | SVc                                    | 3rd cervical, transverse process    | 0.025                                     |                              |       |
|                                       |                                               |                                        | 4th cervical, transverse process    | 0.025                                     |                              |       |
|                                       |                                               |                                        | 5th cervical, transverse process    | 0.025                                     |                              |       |
|                                       |                                               |                                        | 6th cervical, transverse process    | 0.025                                     |                              |       |
|                                       |                                               |                                        | 7th cervical, transverse process    | 0.025                                     |                              |       |
|                                       |                                               | SVt                                    | 1st thoracic rib, distal one-third  | 0.112                                     |                              |       |
|                                       |                                               |                                        | 1st thoracic rib, distal end        | 0.119                                     |                              |       |
|                                       |                                               |                                        | 2nd thoracic rib, distal end        | 0.093                                     |                              |       |
|                                       |                                               |                                        | 3rd thoracic rib, distal end        | 0.100                                     |                              |       |
|                                       |                                               |                                        | 4th thoracic rib, distal end        | 0.092                                     |                              |       |
|                                       |                                               |                                        | 5th thoracic rib, distal end        | 0.112                                     |                              |       |
|                                       |                                               |                                        | 6th thoracic rib, distal end        | 0.095                                     |                              |       |
|                                       |                                               |                                        | RHt                                 | 2nd thoracic, neural spine, distal end    | 0.319                        |       |
|                                       |                                               |                                        |                                     | $1 \times F_{COM}$                        | COM                          | 0.731 |
|                                       |                                               |                                        |                                     | $2 \times F_{COM}$                        | COM                          | 1.461 |
|                                       |                                               |                                        | $3 \times F_{COM}$                  | COM                                       | 2.192                        |       |
|                                       |                                               | <i>Chamaeleo melleri</i>               | KPM NFR476                          | SVc                                       | 2nd cervical, rib distal end | 4.168 |
| 4th cervical rib, distal half         | 0.787                                         |                                        |                                     |                                           |                              |       |
| 4th cervical rib, distal three-eighth | 0.668                                         |                                        |                                     |                                           |                              |       |
| 4th cervical rib, distal end          | 1.060                                         |                                        |                                     |                                           |                              |       |
| 5th cervical rib, distal end          | 1.046                                         |                                        |                                     |                                           |                              |       |
| SVt                                   | 1st thoracic rib, distal one-fifth            |                                        |                                     | 0.954                                     |                              |       |
|                                       | 2nd thoracic rib, distal one-third            |                                        |                                     | 0.840                                     |                              |       |
|                                       | 2nd thoracic, neural spine, distal four-fifth |                                        |                                     | 0.847                                     |                              |       |
|                                       | $1 \times F_{COM}$                            |                                        |                                     | COM                                       | 3.285                        |       |
|                                       | $2 \times F_{COM}$                            |                                        |                                     | COM                                       | 6.570                        |       |
|                                       | $3 \times F_{COM}$                            |                                        |                                     | COM                                       | 9.856                        |       |
|                                       | $4 \times F_{COM}$                            | COM                                    | 13.141                              |                                           |                              |       |

Institutional abbreviations: KPM, Kanagawa Prefectural Museum of Natural History, Odawara, Japan; SIF, personal collections of S.-i. Fujiwara, Nagoya University Museum, Nagoya, Japan.

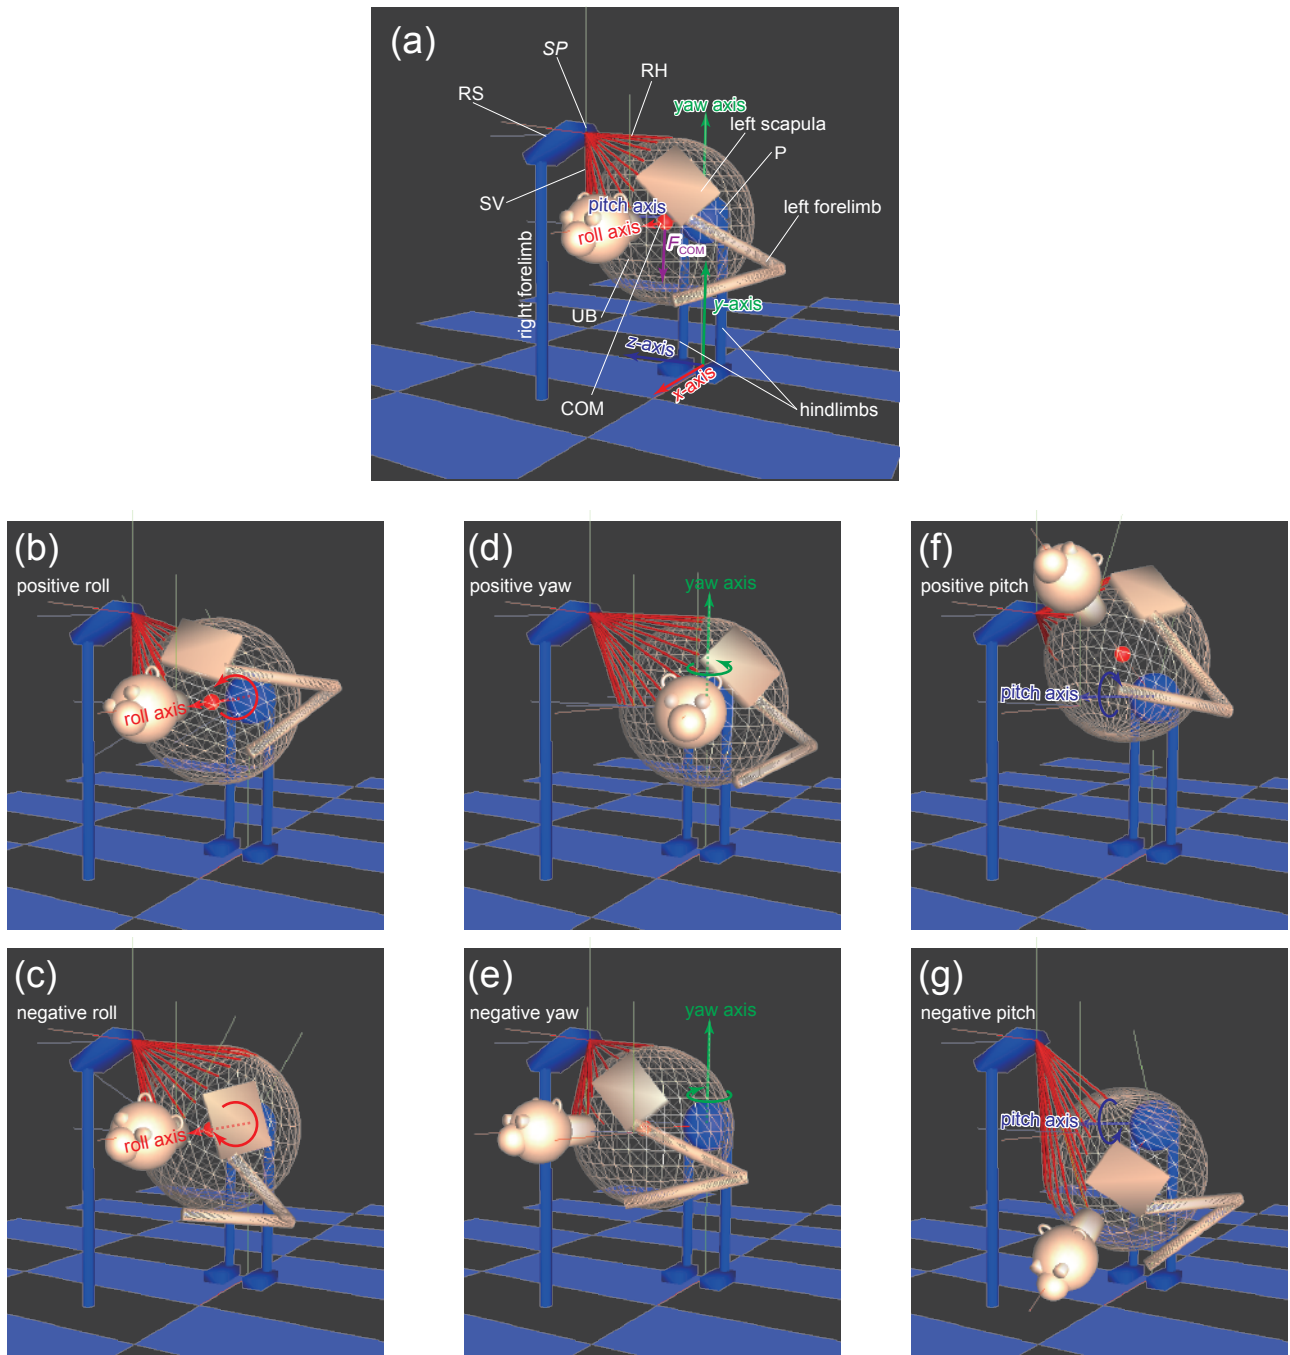

**Fig. S10** Definitions of the rotational (roll, yaw, and pitch) axes of the uplifted body element (UB) in this study. The musculoskeletal model was constructed in the  $x$ ,  $y$ ,  $z$  coordinate space. The  $x$ -,  $y$ -, and  $z$ -axes, respectively correspond to longitudinal, vertical, and transverse orientations. The model assumes the support on the right forelimb and hindlimbs, and UB, which is composed of the head, trunk, and the left forelimb, is allowed to rotate three-dimensionally about the pivot on the acetabulum (P). Roll axis was defined as the line through the point P and centre of mass (COM) of the UB. Yaw axis was defined as the line perpendicular to the roll axis. Both roll and yaw axes were on the medial plane ( $z = 0$ ). Pitch axis was defined as the line perpendicular to both roll and yaw axes. UB and right forelimb are connected to each other via thoracic muscles, such as *m. rhomboideus* (RH) and *m. serratus ventralis* (SV). UB is subjected to downward gravity force ( $F_{COM}$ ) and net contractive forces applied by the muscle fascicles, and these forces rotate UB about point P. The rotations of UB about roll, yaw, and pitch axes are shown: (a) default posture with no roll, yaw, and pitch rotations; positive (b) roll, (c) yaw, and (d) pitch. The images were shown in the perspective projections. The three-dimensional musculoskeletal model was constructed using SIMM 6.0.3 (Musculographics Inc.). Abbreviation: SP, scapular position.



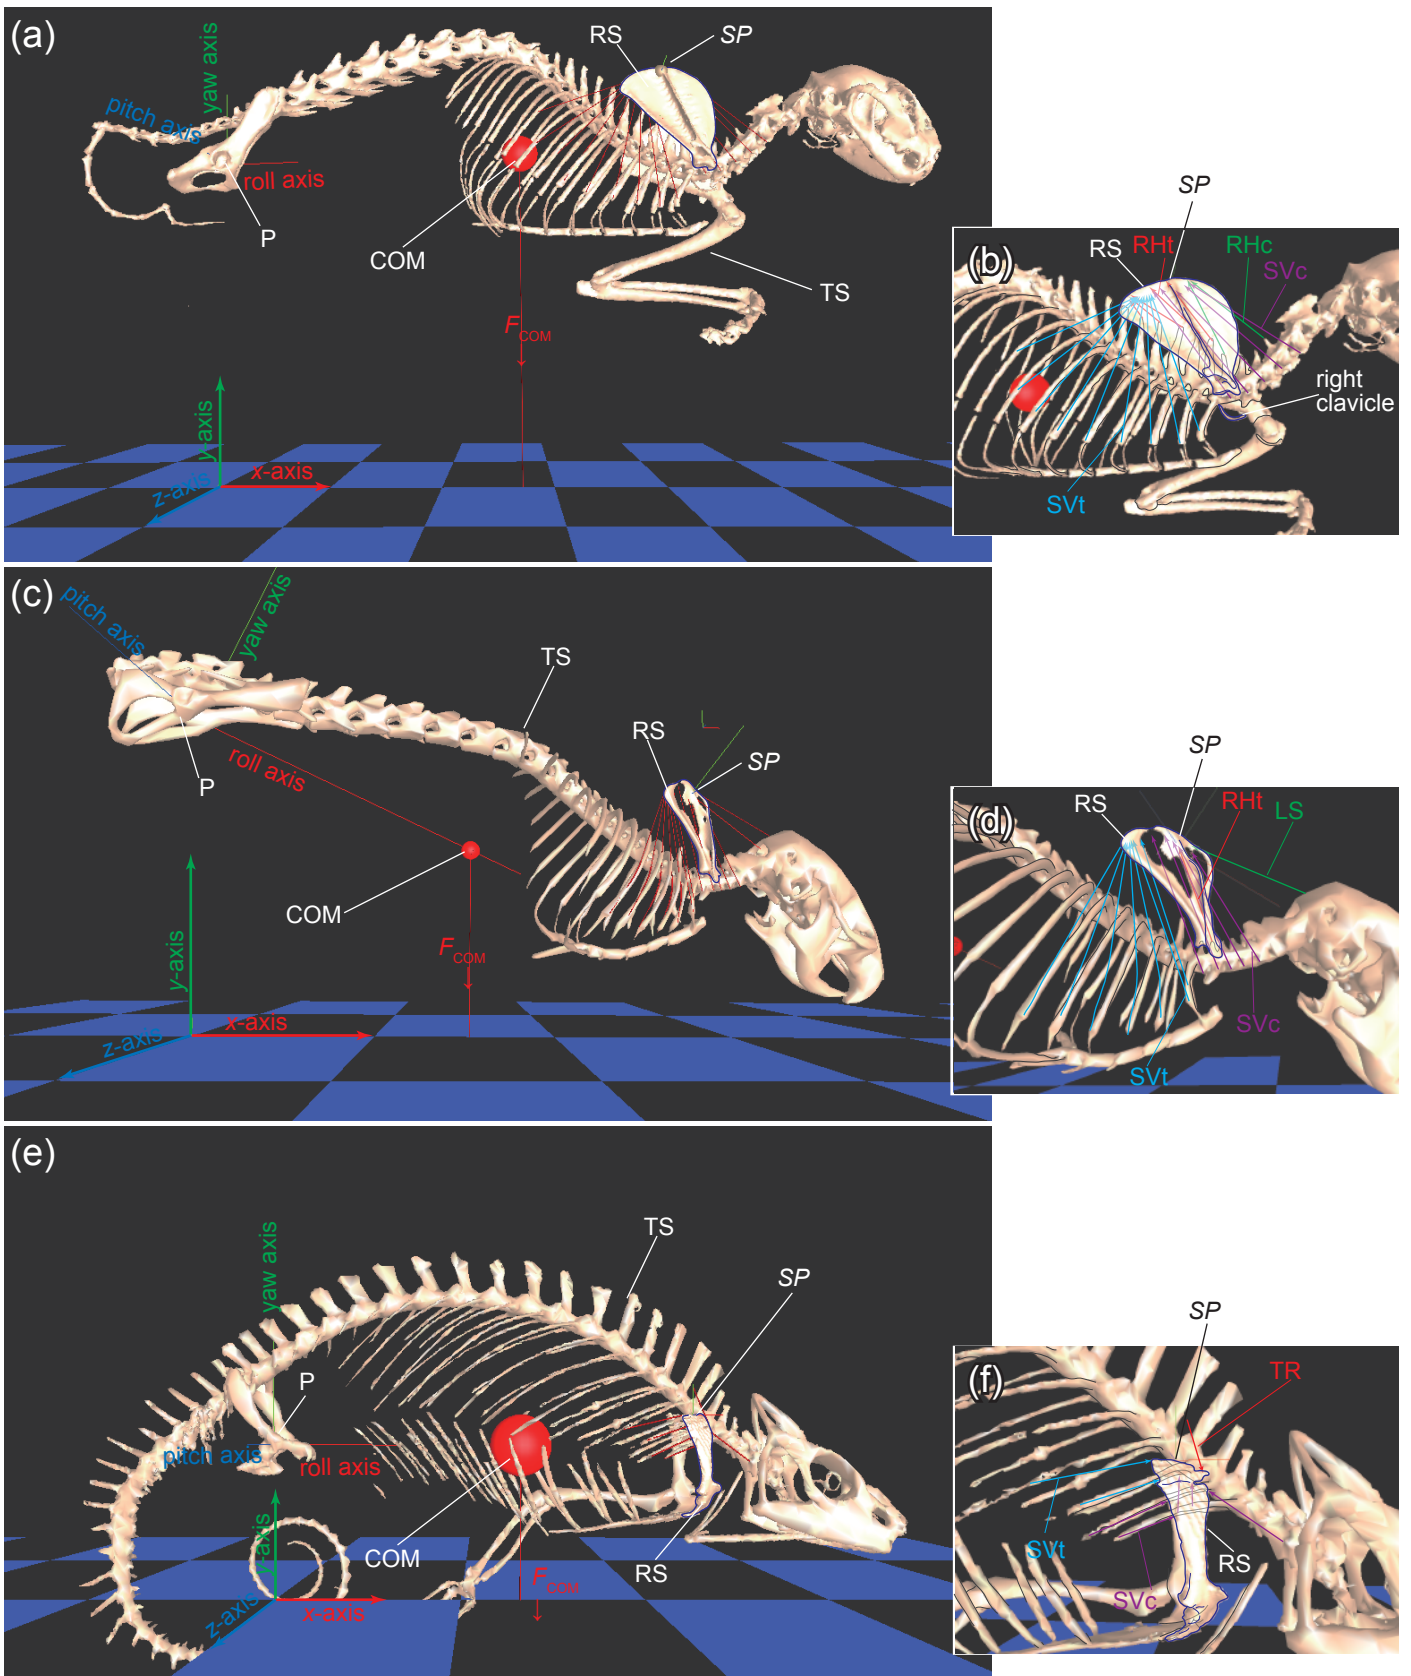

**Fig. S11** Rotation models of (a, b) *Felis*, (c, d) *Rattus*, and (e, f) *Chamaeleo*: (a, c, e) musculoskeletal models constructed in SIMM 6.0.3 (Musculographics Inc.); (b, d, f) the arrangements of anti-gravity muscles that originate from the trunk and insert to the top position of the scapula. Uplifted body element (UB) is subjected to the downward gravity force ( $F_{COM}$ ) at the centre of mass (COM). The musculoskeletal models were constructed in  $x, y, z$  coordinate space:  $x$ , longitudinal;  $y$ , vertical; and  $z$ , transverse axes. Abbreviations: COM, centre of mass of the UB; LS, *m. levator scapulae*; P, a common pivot of the UB and TS at the acetabulum; RHc, *m. rhomboideus cervicis*; RHt, *m. rhomboideus thoracis*; RS, right scapula; SP, scapular position; SVc, *m. serratus ventralis cervicis*; SVt, *m. serratus ventralis thoracis*; TR, *m. trapezius*; TS, thoracic skeleton. The UB and TS are allowed to rotate freely about the point P, whereas the RS is allowed to translate three-dimensionally along the  $x$ -,  $y$ -,  $z$ -axes. See Table S3 for the muscle fascicle origins and insertions.

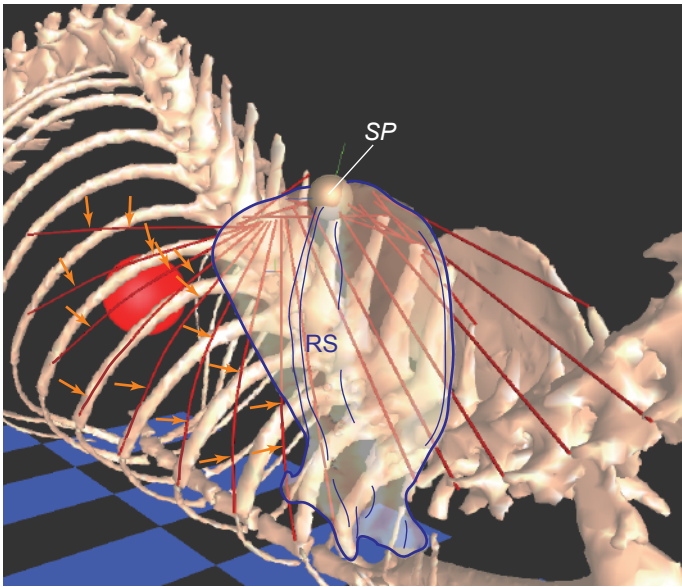

**Fig. S12** Paths of the muscle fascicles modeled in the rotation models. The anti-gravity thoracic muscles were modeled to wrap around the rib cage not to run through inside the thoracic skeleton in SIMM 8.0.1. The muscle fascicle paths between the orange colored arrows wrap around the rib cage. Abbreviations: RS, right scapula; SP, scapular position.

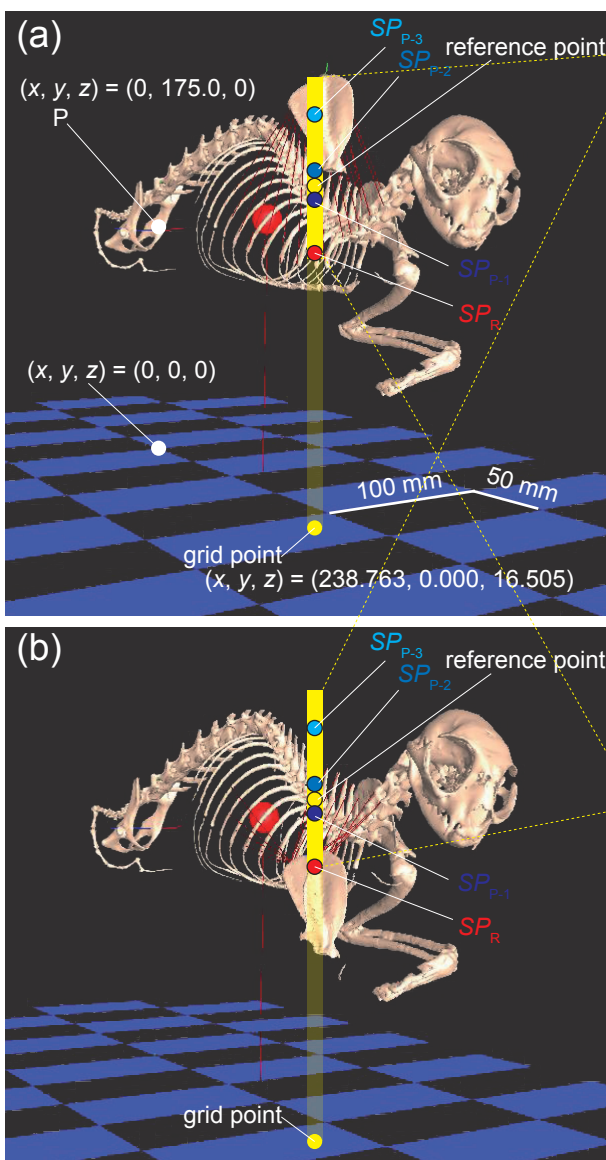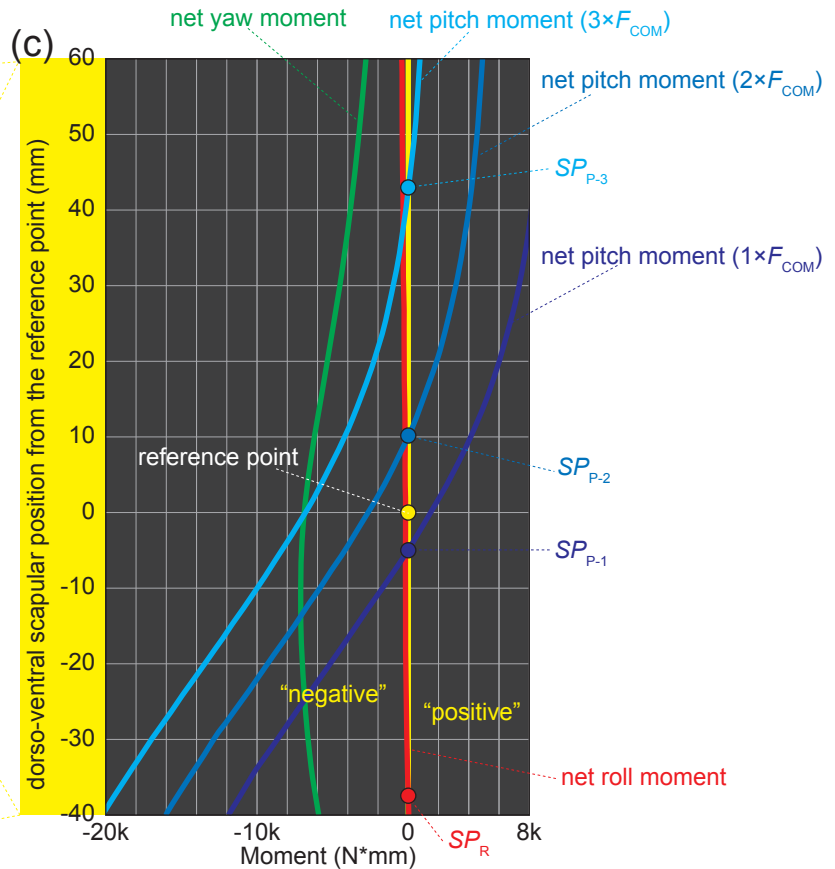

**Fig. S13** An example of the moment analysis in the rotation model. The (a) and (b) respectively show that the dorso-ventral positions of the scapula (SP) are at +60 mm and -40 mm, respectively, from the reference point  $(x, y, z) = (238.763, 195.232, 16.505)$ . The net moment on the uplifted body element (UB) was generated by the contractive forces of the thoracic muscles connecting the trunk and right scapula, and the downward gravity force ( $n \times F_{COM}$ ;  $n = 1, 2, 3$ ) on the centre of mass (COM). (c) Relationships between the net roll, yaw, and pitch moments of the UB and the dorso-ventral scapular position (SP) along the line parallel with the y-axis through the grid point  $(x, y, z) = (238.763, 0.000, 16.505)$  and the reference point. The original point of the x, y, z-coordinate space was defined as the point 175.0 mm beneath the pivot (P) of the UB. SP where the net roll, yaw, and pitch moments become zero were respectively defined as  $SP_R$ ,  $SP_Y$ , and  $SP_P$ .  $SP_P$  estimated for the different  $n \times F_{COM}$  ( $n = 1, 2, 3$ ) was respectively defined as  $SP_{P-1}$ ,  $SP_{P-2}$ , and  $SP_{P-3}$ . The range of dorso-ventral position of SP shown in (c) corresponds to the yellow bars in (a) and (b).

**Table S3** The conditions of the moment analyses. The model used for the analyses, the percentage of the force applied for each muscle fascicles in relation to the possible maximum contractile force ( $F_{max}$ ), the orientation of the centre of mass acceleration (COM-accel.), and the reference figures for the results of each analysis are shown. See  $F_{max}$  in Table S2 for the contractile force of each muscle fascicle. Abbreviations:  $F_{COM}$ , downward vertical force on the center of mass; LS, *m. levator scapulae*; RHc, *m. rhomboideus cervicis*; RHt, *m. rhomboideus thoracis*; SVc, *m. serratus ventralis cervicis*; SVt, *m. serratus ventralis thoracis*; TR, *m. trapezius*. The RH and SV were separated into the cervical and thoracic fibres based on its origin.

| analysis                             | model                   | LS           | RHc   | RHt   | SVc   | SVt   | TR  | $F_{COM}$ | COM-accel.   | result                                    |                     |
|--------------------------------------|-------------------------|--------------|-------|-------|-------|-------|-----|-----------|--------------|-------------------------------------------|---------------------|
| (a) vertically-accelerated (control) | <i>Felis</i>            | —            | × 1   | × 1   | × 1   | × 1   | —   | × 1       | vertical     | Fig. 4a,d; Fig. S15; Fig. S18a; Fig. S19a |                     |
|                                      |                         | —            | × 1   | × 1   | × 1   | × 1   | —   | × 2       | vertical     | Fig. 4a,d                                 |                     |
|                                      |                         | —            | × 1   | × 1   | × 1   | × 1   | —   | × 3       | vertical     | Fig. 4a,d ; Fig. S18a                     |                     |
|                                      | <i>Rattus</i>           | × 1          | —     | × 1   | × 1   | × 1   | —   | × 1       | vertical     | Fig. 4b,e; Fig. S16                       |                     |
|                                      |                         | × 1          | —     | × 1   | × 1   | × 1   | —   | × 2       | vertical     | Fig. 4b,e                                 |                     |
|                                      |                         | × 1          | —     | × 1   | × 1   | × 1   | —   | × 3       | vertical     | Fig. 4b,e                                 |                     |
|                                      | <i>Chamaeleo</i>        | —            | —     | —     | × 1   | × 1   | × 1 | × 1       | × 1          | vertical                                  | Fig. 4c,f; Fig. S17 |
|                                      |                         | —            | —     | —     | × 1   | × 1   | × 1 | × 2       | × 2          | vertical                                  | Fig. 4c,f           |
|                                      |                         | —            | —     | —     | × 1   | × 1   | × 1 | × 3       | × 3          | vertical                                  | Fig. 4c,f           |
|                                      |                         | —            | —     | —     | × 1   | × 1   | × 1 | × 4       | × 4          | vertical                                  | Fig. 4c,f           |
| (b) anteriorly-accelerated           | <i>Felis</i>            | —            | × 1   | × 1   | × 1   | × 1   | —   | × 1       | 15° anterior | Fig. S18b                                 |                     |
|                                      |                         | —            | × 1   | × 1   | × 1   | × 1   | —   | × 3       | 15° anterior | Fig. S18b                                 |                     |
|                                      | posteriorly-accelerated | <i>Felis</i> | —     | × 1   | × 1   | × 1   | × 1 | —         | × 1          | 15° posterior                             | Fig. S18c           |
|                                      |                         |              | —     | × 1   | × 1   | × 1   | × 1 | —         | × 3          | 15° posterior                             | Fig. S18c           |
|                                      | rightward-accelerated   | <i>Felis</i> | —     | × 1   | × 1   | × 1   | × 1 | —         | × 1          | 15° rightward                             | Fig. S18d           |
|                                      |                         |              | —     | × 1   | × 1   | × 1   | × 1 | —         | × 3          | 15° rightward                             | Fig. S18d           |
|                                      | leftward-accelerated    | <i>Felis</i> | —     | × 1   | × 1   | × 1   | × 1 | —         | × 1          | 15° leftward                              | Fig. S18e           |
|                                      |                         |              | —     | × 1   | × 1   | × 1   | × 1 | —         | × 3          | 15° leftward                              | Fig. S18e           |
| (c) RHc-SVc-dependent                | <i>Felis</i>            | —            | × 1   | × 0.5 | × 1   | × 0.5 | —   | × 1       | vertical     | Fig. S19b                                 |                     |
|                                      | <i>Felis</i>            | —            | × 0.5 | × 1   | × 0.5 | × 1   | —   | × 1       | vertical     | Fig. S19c                                 |                     |
|                                      | <i>Felis</i>            | —            | × 1   | × 1   | × 0.5 | × 0.5 | —   | × 1       | vertical     | Fig. S19d                                 |                     |
|                                      | <i>Felis</i>            | —            | × 0.5 | × 0.5 | × 1   | × 1   | —   | × 1       | vertical     | Fig. S19e                                 |                     |

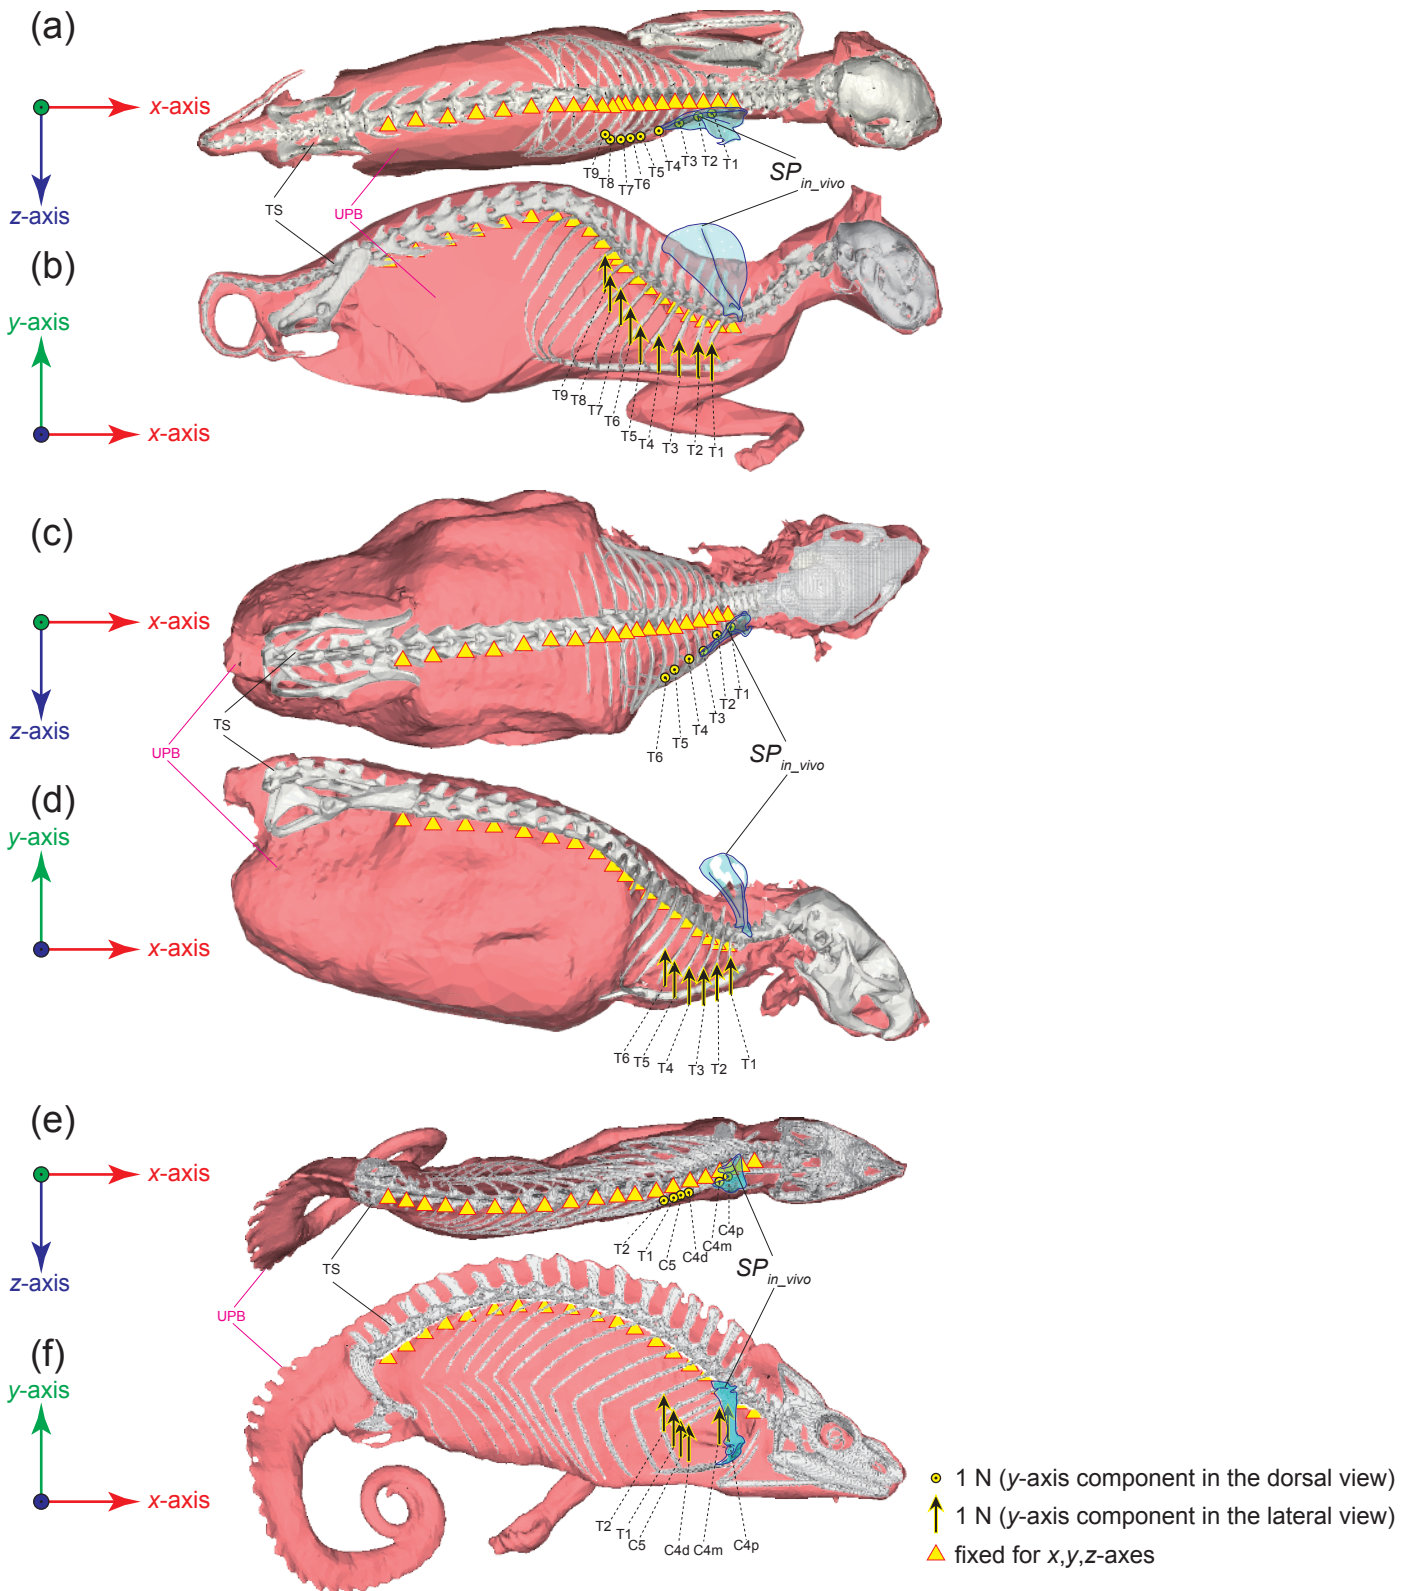

Fig. S14. Boundary conditions of the distortion models in (a, b) *Felis*, (c, d) *Rattus*, and (e, f) *Chamaeleo*: (a, c, e) the dorsal view; (a, c, e) the right lateral view. The thoracic skeleton (TS) of the uplifted body element (UB) was composed of the ~100,000 small cubic voxels. The vertebral column in the trunk was fixed for the  $x, y, z$ -axes, and each origins of *m. serratus ventralis* was subjected to a lifting force (1 N) parallel with the  $y$ -axis. The musculature fascicle origins were indicated as follows:  $C_n$ , origin on the  $n$ th cervical rib;  $T_n$ , origin on the  $n$ th thoracic rib. Three fascicle origins occur on the 4th cervical rib of the *Chamaeleo*: proximal (C4p), middle (C4m), and distal (C4d) origins. The scapular positions *in vivo* ( $SP_{in\_vivo}$ ) were based on the literature (*Felis* [Macpherson & Ye, 1998]; *Rattus* [Jenkins, 1974]; *Chamaeleo* [Fischer et al. 2010]: see Fig. S3).

**Fig. S15** Thoracic skeleton (TS) of the uplifted body element (UB) and the appropriate scapular positions in support on right forelimb in *Felis*. The scale ball (a sphere in green color; 50 mm in diameter) was set on the origin ( $x, y, z = 0, 0, 0$ ) of the three-dimensional coordinate space. Three axes through the origin indicate the x- (cranio-caudal; red), y- (dorso-ventral; green), and z- (medio-lateral; blue) axes of the space. The three axes through the common pivot P of the TS and UB indicate the roll (red), yaw (green), and pitch (blue) axes. A sphere in purple indicates centre of mass (COM) of the UB. The distributions of the optimum scapular positions (SP), at which the net roll and yaw moments caused by maximum contractive forces of the thoracic muscle fascicles ( $F_{max}$ ) and gravity force on the COM ( $F_{COM}$ ) become zero, were respectively indicated in red ( $SP_R$ ) and green ( $SP_Y$ ). The SPs, at which the net pitch moments generated by the  $F_{max}$  the  $n \times F_{COM}$  ( $n = 1, 2, 3$ ) become zero, were respectively indicated in dark blue ( $SP_{P-1}$ ;  $n = 1$ ), blue ( $SP_{P-2}$ ;  $n = 2$ ), and light blue ( $SP_{P-3}$ ;  $n = 3$ ).

**Fig. S16** Thoracic skeleton (TS) of the uplifted body element (UB) and the appropriate scapular positions in support on right forelimb in *Rattus*. The scale ball (a sphere in green color; 20 mm in diameter) was set on the origin ( $x, y, z = 0, 0, 0$ ) of the three-dimensional coordinate space. Three axes through the origin indicate the  $x$ - (cranio-caudal; red),  $y$ - (dorso-ventral; green), and  $z$ - (medio-lateral; blue) axes of the space. The three axes through the common pivot  $P$  of the TS and UB indicate the roll (red), yaw (green), and pitch (blue) axes. A sphere in purple indicates centre of mass (COM) of the UB. The distributions of the optimum scapular positions ( $SP$ ), at which the net roll and yaw moments caused by maximum contractive forces of the thoracic muscle fascicles ( $F_{max}$ ) and gravity force on the COM ( $F_{COM}$ ) become zero, were respectively indicated in red ( $SP_R$ ) and green ( $SP_Y$ ). The  $SP$ s, at which the net pitch moments generated by the  $F_{max}$  the  $n \times F_{COM}$  ( $n = 1, 2, 3$ ) become zero, were respectively indicated in dark blue ( $SP_{P-1}$ ;  $n = 1$ ), blue ( $SP_{P-2}$ ;  $n = 2$ ), and light blue ( $SP_{P-3}$ ;  $n = 3$ ).

**Fig. S17** Thoracic skeleton (TS) of the uplifted body element (UB) and the appropriate scapular positions in support on right forelimb in *Chamaeleo*. The scale ball (a sphere in green color; 20 mm in diameter) was set on the origin ( $x, y, z = 0, 0, 0$ ) of the three-dimensional coordinate space. Three axes through the origin indicate the x- (cranio-caudal; red), y- (dorso-ventral; green), and z- (medio-lateral; blue) axes of the space. The three axes through the common pivot P of the TS and UB indicate the roll (red), yaw (green), and pitch (blue) axes. A sphere in purple indicates centre of mass (COM) of the UB. The distributions of the optimum scapular positions (SP), at which the net roll and yaw moments caused by maximum contractive forces of the thoracic muscle fascicles ( $F_{\max}$ ) and gravity force on the COM ( $F_{\text{COM}}$ ) become zero, were respectively indicated in red ( $SP_R$ ) and green ( $SP_Y$ ). The SPs, at which the net pitch moments generated by the  $F_{\max}$  the  $n \times F_{\text{COM}}$  ( $n = 1, 2, 3$ ) become zero, were respectively indicated in dark blue ( $SP_{P-1}$ :  $n = 1$ ), blue ( $SP_{P-2}$ :  $n = 2$ ), light blue ( $SP_{P-3}$ :  $n = 3$ ), and lighter-most blue ( $SP_{P-4}$ :  $n = 4$ ).

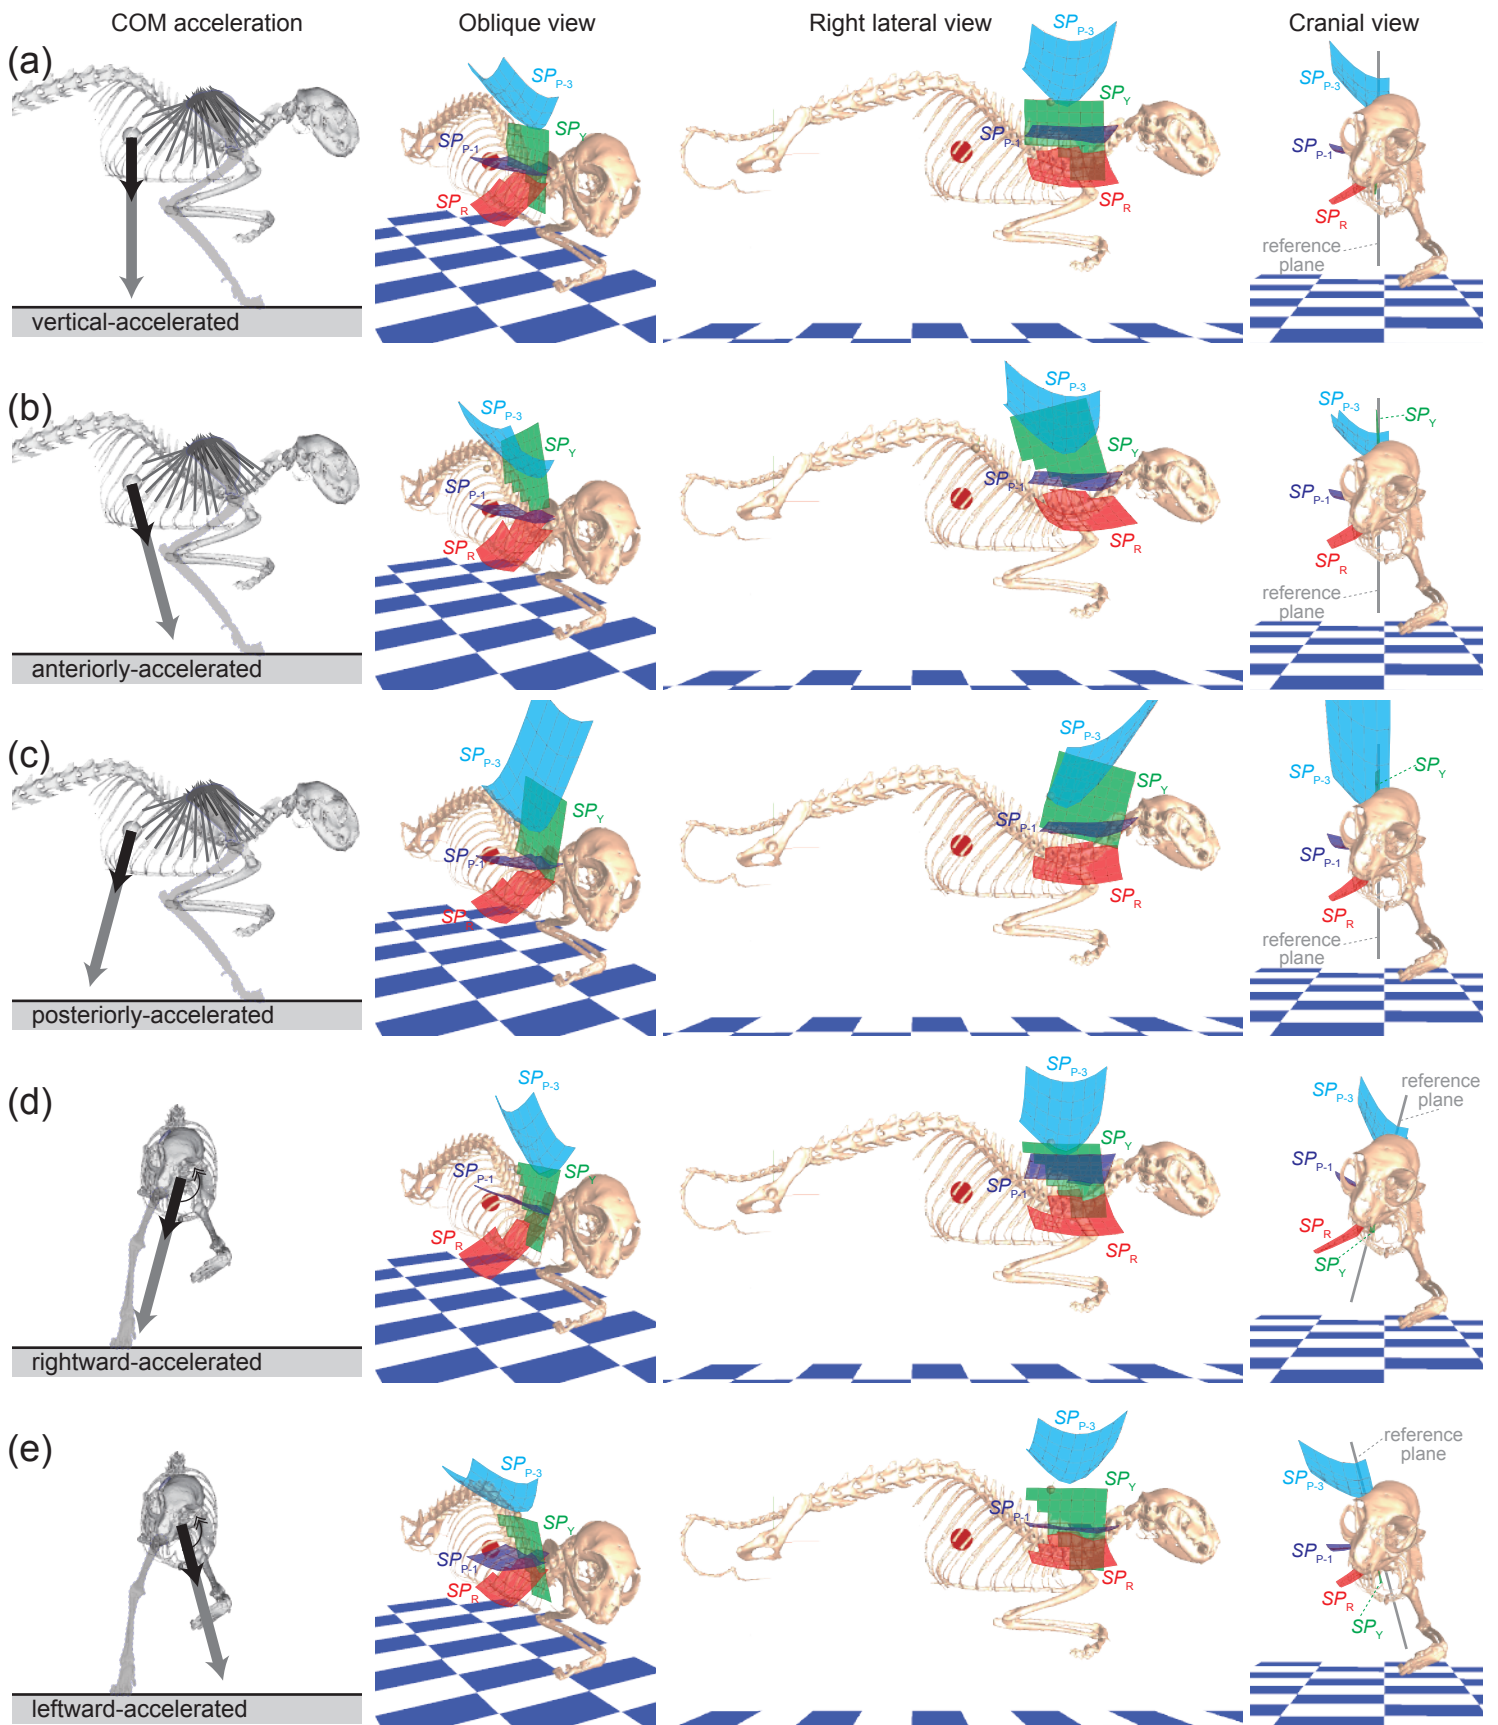

**Fig. S18** Appropriate scapular positions ( $SP$ ) estimated for *Felis* in rotation models with the centre of mass (COM) accelerated in different orientations: (a) vertically; and (b) anteriorly-, (c) posteriorly-, (d) rightward-, and (e) leftward-inclined. See Table S3 for the conditions of the analyses. The scapular positions at which the net roll ( $SP_R$ ), yaw ( $SP_Y$ ), and pitch ( $SP_{P-n}$ ) generated by the contractive force of the thoracic muscles and the COM accelerations ( $n \times F_{COM}$ ;  $n = 1, 3$ ) applied to the fascicle origins and the COM, respectively, become zero were indicated in different colours. The images are shown in orthogonal projection. The reference plane is defined as a plane parallel to the roll and yaw axes of the body element uplifted by the thoracic muscles, which rotates about the acetabulum.



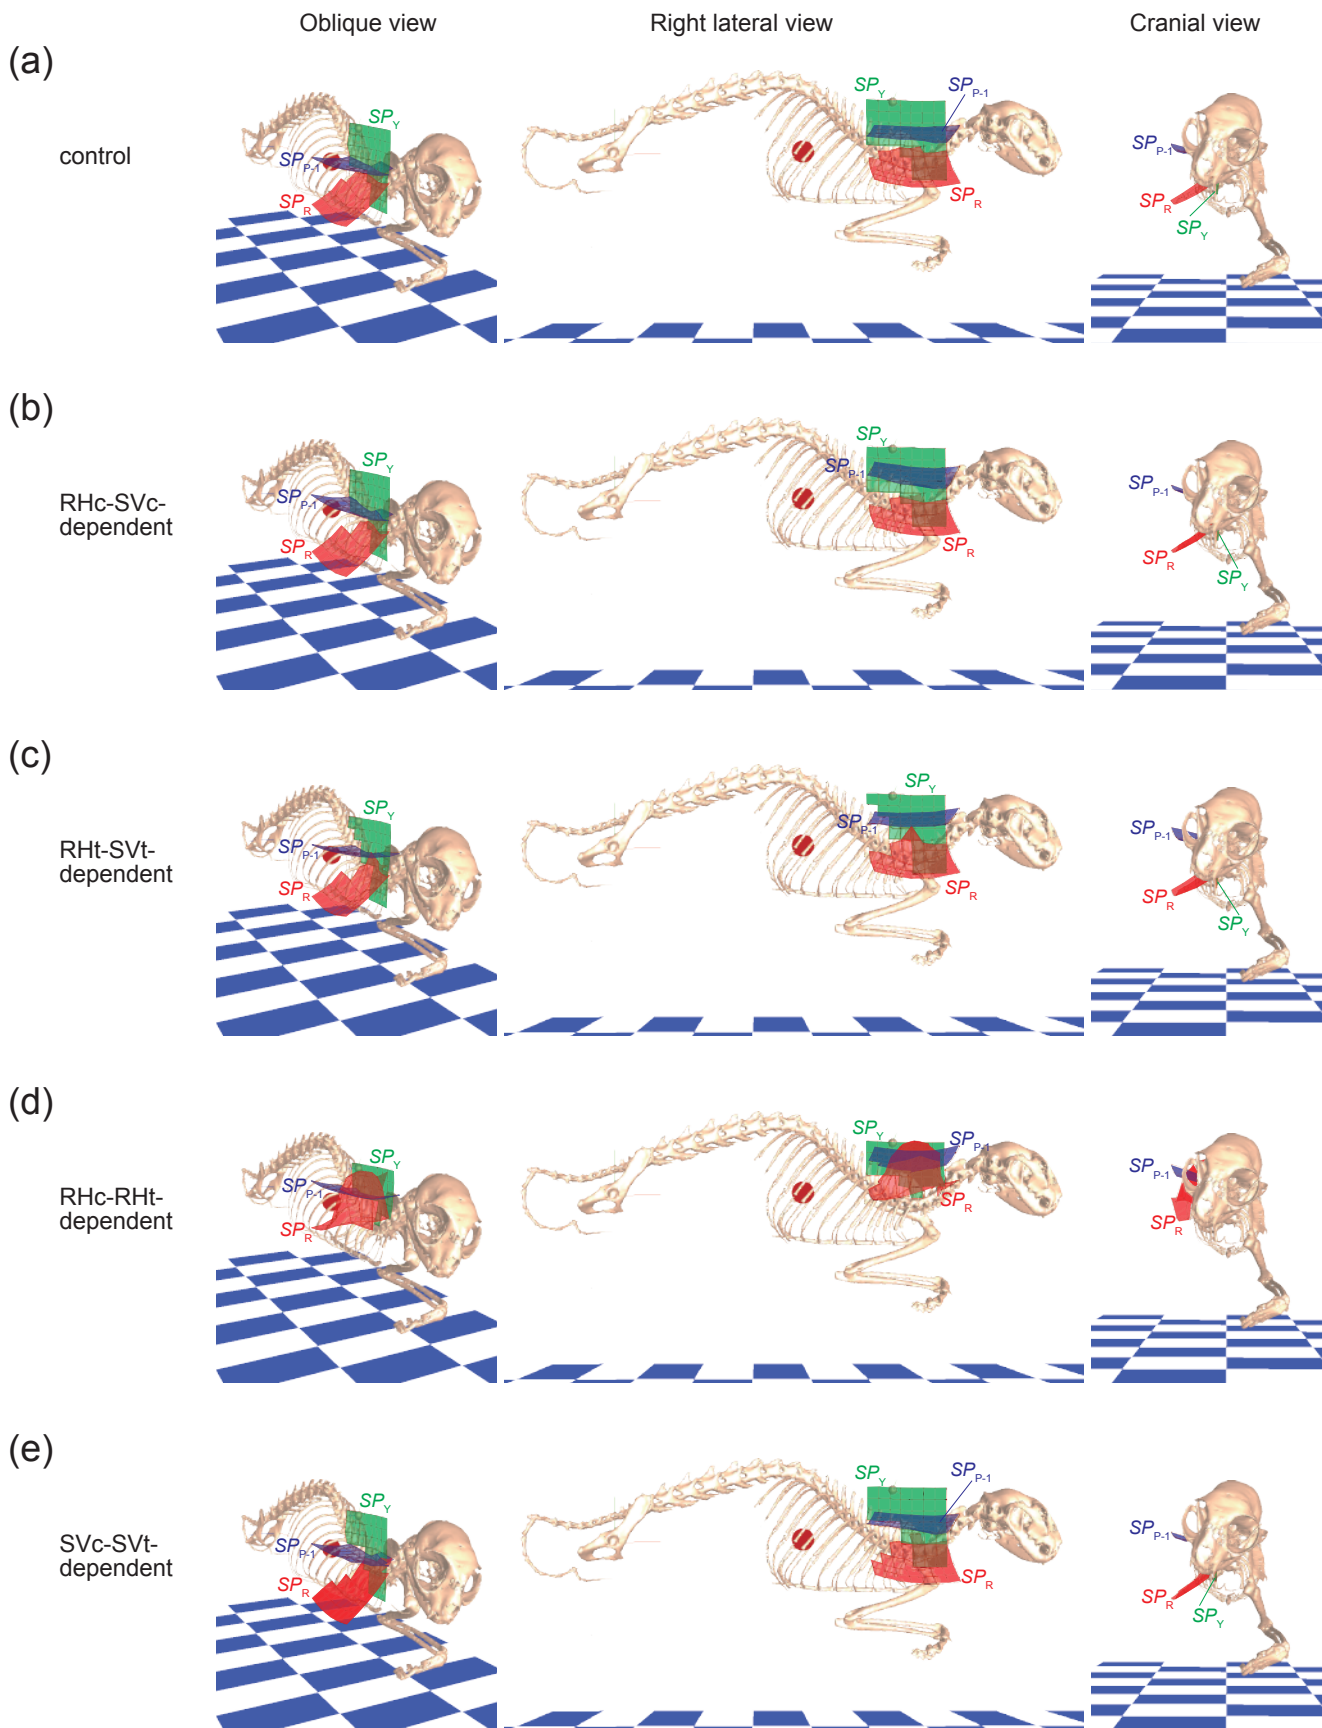

**Fig. S19** Appropriate scapular positions ( $SP$ ) estimated for *Felis* in rotation models with the thoracic muscle fascicles activated in different contractile forces. See Table S3a,c for the contractile forces of the thoracic muscles (RHc, *m. rhomboideus cervicis*; RHt, *m. rhomboideus thoracis*; SVc, *m. serratus ventralis cervicis*; SVt, *m. serratus ventralis thoracis*) applied in each model: (a) control (Table S3a); and (b) RHc-SVc-, (c) RHt-SVt-, (d) RHc-RHt-, and (e) SVc-SVt-dependent models. The scapular positions at which the net roll ( $SP_R$ ), yaw ( $SP_Y$ ), and pitch ( $SP_{P-1}$ ) generated by the contractive force of the thoracic muscles and the COM accelerations ( $1 \times F_{COM}$ ) applied to the fascicle origins and the COM, respectively, become zero were indicated in different colours. The images are shown in orthogonal projection.
